# Supplementary material for: Bidirectional catalyst design for lithium–sulfur batteries: phase regulation cooperates with N-doping
Source: Royal Society of Chemistry journal article supplement (doi:10.1039/d2ta06793e), 2022-01-01
Supplement: d2ta06793e1.pdf [file d2ta06793e1.pdf]

## Supporting Information

# Bidirectional Catalyst Design for Lithium-Sulfur Batteries: Phase Regulation Cooperates with N-Doping

Xinqi Liang<sup>a</sup>, Jinyan Cai<sup>b</sup>, Saisai Qiu<sup>a</sup>, Shuwen Ni<sup>b</sup>, Yulong Liu<sup>a</sup>, Xi Wang<sup>a</sup>, Gongming Wang<sup>b</sup>, Zhen Chen<sup>a\*</sup>, Minghua Chen<sup>a\*</sup>

<sup>a</sup> Key Laboratory of Engineering Dielectric and Applications (Ministry of Education), School of Electrical and Electronic Engineering, Harbin University of Science and Technology, Harbin 150080, China

<sup>b</sup> Hefei National Laboratory for Physical Science at the Microscale, Department of Chemistry, University of Science & Technology of China, Hefei 230026, China

\*Corresponding author.

E-mail address: mhchen@hrbust.edu.cn (M. H. Chen)

E-mail address: chen.zhen@hrbust.edu.cn (Z. Chen)

## Experimental Section

**1. Synthesis of MoS<sub>2</sub>@CNTs:** Before the preparation of MoS<sub>2</sub>@CNTs, purchased CNTs were first activated by hydrothermal treatment with concentrated nitric acid at 90 °C to obtain better hydrophilicity. And the ultrathin MoS<sub>2</sub> nanoflakes anchored CNTs was synthetic by a hydrothermal method. In a typical preparation, 40 mg of CNTs were dispersed into 40 mL of deionized water, and 0.4 g of glucose was added to the above solution stirred for 30 minutes until dissolved. 0.4 g of sodium molybdate dihydrate (Na<sub>2</sub>MoO<sub>4</sub>·2H<sub>2</sub>O) and 0.8 g of thiourea were added to the homogeneous solution and stirred for 30 min, respectively. Finally, the reaction liquid was transferred to a 100 mL reactor, sealed, and kept at 200 °C for 2 h. Afterwards, the precipitate was collected by centrifugation and cleaned several times with deionized water and ethanol.

**2. Preparation of N-MoS<sub>2</sub>@CNTs:** Firstly, the as-prepared MoS<sub>2</sub>@CNTs powder is evenly dispersed on the surface of the quartz plate in a thin layer. Then, the quartz plate loaded with the sample was transferred to the plasma reaction chamber. We chose NH<sub>3</sub> as the nitrogen source and fed it into the system at a fed rate of 25 sccm. The pressure in the reaction chamber was maintained at 10 Pa during the glow discharge process. The power of RF plasma was at 250 W for 30-120 s to control N doping content.

**3. Preparation of S/CNTs, S/MoS<sub>2</sub>@CNTs and S/N-MoS<sub>2</sub>@CNTs:** The preparation methods of the S/CNTs, S/MoS<sub>2</sub>@CNTs, S/N-MoS<sub>2</sub>@CNTs are similar, so we take the

preparation of S/N-MoS<sub>2</sub>@CNTs composite as an example. CNT, N-MoS<sub>2</sub>@CNTs and S were mixed and ground at a mass ratio of 2:2:6, then encapsulated in a Pasteures-tube, sealed and heated at 155 °C for 12 h. The preparation method of S/CNTs and S/MoS<sub>2</sub>@CNTs composite positive electrodes is the same as above, except that N-MoS<sub>2</sub> is replaced by responding samples.

**4. Materials Characterization:** SEM (Hitachi SU8020) was used to the morphology of the samples. TEM (JEOL JEM-2100) equipped with an energy dispersive spectrometer was used to further characterize the morphology and microstructure of the samples. XRD of all samples were performed on the EMPYREAN X-ray diffractometer using Cu K $\alpha$  radiation from 5° to 80°. XPS spectra were obtained using a PHI 5000Versa Probe system. TGA was conducted on a Perkin-Elmer TGA 7 thermogravimetric analysis. The EPR measurement of vacancies was conducted with an Endor spectrometer (Bruker A300) at 77 K.

#### **5. Electrochemical Measurements:**

The prepared sulfur composite cathode (S/CNTs, S/MoS<sub>2</sub>@CNTs, S/N-MoS<sub>2</sub>@CNTs) was mixed with Super P and PVDF at a mass ratio of 8:1:1 and dispersed in NMP. The homogeneous slurry formed was blade coating onto an aluminum foil and dried at 60 °C for 24 h in a vacuum oven to ensure the complete removal of solvent. The S load on the single electrode is about 1.1-1.35 mg cm<sup>-2</sup> and the electrolyte was a combination of 1 M lithium bis (trifluoromethane sulfonyl)imide and 2 wt% LiNO<sub>3</sub> dissolved in 1,3-dioxolane and 1,2-dimethoxyethane (DOL: DME=1:1, v/v). The E/S is 20  $\mu$ L/mg. All cyclic performance tests were carried out under this condition except for the performance test of high sulfur load. The E/S under the condition of high sulfur load is 12  $\mu$ L/mg. The electrochemical tests were performed with coin-type cells (CR2032) constructed with lithium metal foil as the anode. A microporous polypropylene film membrane (Celgard 2325) was used to separate the electrodes. All cells were prepared in an Ar-filled dry box (MBRAUN). The cells were typically cycled at 25 °C at constant currents equivalent to 0.2 C and 1 C rates within the voltage range of 1.8-2.6 V. The rate values in this paper are based on the theoretical capacity of sulfur (1675 mA g<sup>-1</sup>). The specific capacities were calculated based on the sulfur mass loadings.

**6. Preparation of Li<sub>2</sub>S<sub>6</sub> Electrolyte:** Li<sub>2</sub>S and sulfur were mixed at a molar ratio of 1:5 in conventional electrolyte in a glass bottle. The mixture was magnetic stirred for 24 h at 50 °C in an Ar-filled glove box to obtain a Li<sub>2</sub>S<sub>6</sub> electrolyte (0.2 M) for the symmetric cell characterizations. In addition, Li<sub>2</sub>S<sub>6</sub> electrolyte (5  $\times$  10<sup>-3</sup> M) was prepared through the same method for the adsorption test.

**7. Preparation of Li<sub>2</sub>S<sub>8</sub> Electrolyte:** Li<sub>2</sub>S and sulfur were mixed at a molar ratio of 1:7 in

tetraglyme solution. The mixture was magnetically stirred for 24 h at 50 °C in an Ar-filled glove box to obtain a  $\text{Li}_2\text{S}_8$  electrolyte (0.25 M) for the symmetric cell characterizations.

**8. Symmetric Cells Assembly and Performance Measurement:** The electrodes for symmetric cells were prepared by mixing actively materials and PVDF binder at a weight ratio of 9:1 in NMP to obtained slurry, which was then coated on carbon cloth with a mass loading of  $1.2 \text{ mg cm}^{-2}$ . The punched electrode disks (12 mm) were used as identical working and counter electrodes to assemble symmetric cells with  $\text{Li}_2\text{S}_6$  electrolyte (40  $\mu\text{L}$ ). The CV curves were measured on electrochemical workstation (Chenhua CHI-660e) at a scanning rate of  $0.5 \text{ mV s}^{-1}$  from -1.5 to 1.5 V.

### 9. Theoretical Calculation:

All the calculations were carried out via the plane projector augmented wave based density functional theory (DFT) method on CASTEP code in Material Studio package of Accelrys Inc. The Perdew-Burke-Ernzerhof (PBE) of generalized gradient approximation (GGA) were adopted for the electron exchange and correlation energy with the ultrasoft pseudo-potentials (US) for the core electrons. The  $\text{MoS}_2$  and N- $\text{MoS}_2$  (002) surface were set with periodic 1.3 layer slab and a vacuum width of 15 Å between the slabs along the Z axis. A cutoff energy of 350 eV for plane-wave basis set was adopted for electron wave description. The Brillouin zone was sampled by  $3 \times 3 \times 1$  k-points grid with Monkhorst-Pack mesh method for surface calculation and the self-consistent field (SCF) tolerance was  $1 \times 10^{-5}$  eV/atom for energy convergence criterion and 0.03 eV/Å for force convergence criterion. The polysulfide adsorption energy  $E_{ad}$  is calculated by  $E_{ad} = E_{\text{Li}_2\text{S}_x/\text{surf}} - E_{\text{Li}_2\text{S}_x} - E_{\text{surf}}$ , where  $E_{\text{Li}_2\text{S}_x/\text{surf}}$  and  $E_{\text{surf}}$  are the total energies of the surface with and without the polysulfide adsorbate and  $E_{\text{Li}_2\text{S}_x}$  is the total energy of a free polysulfide molecule.

## Figure Captions

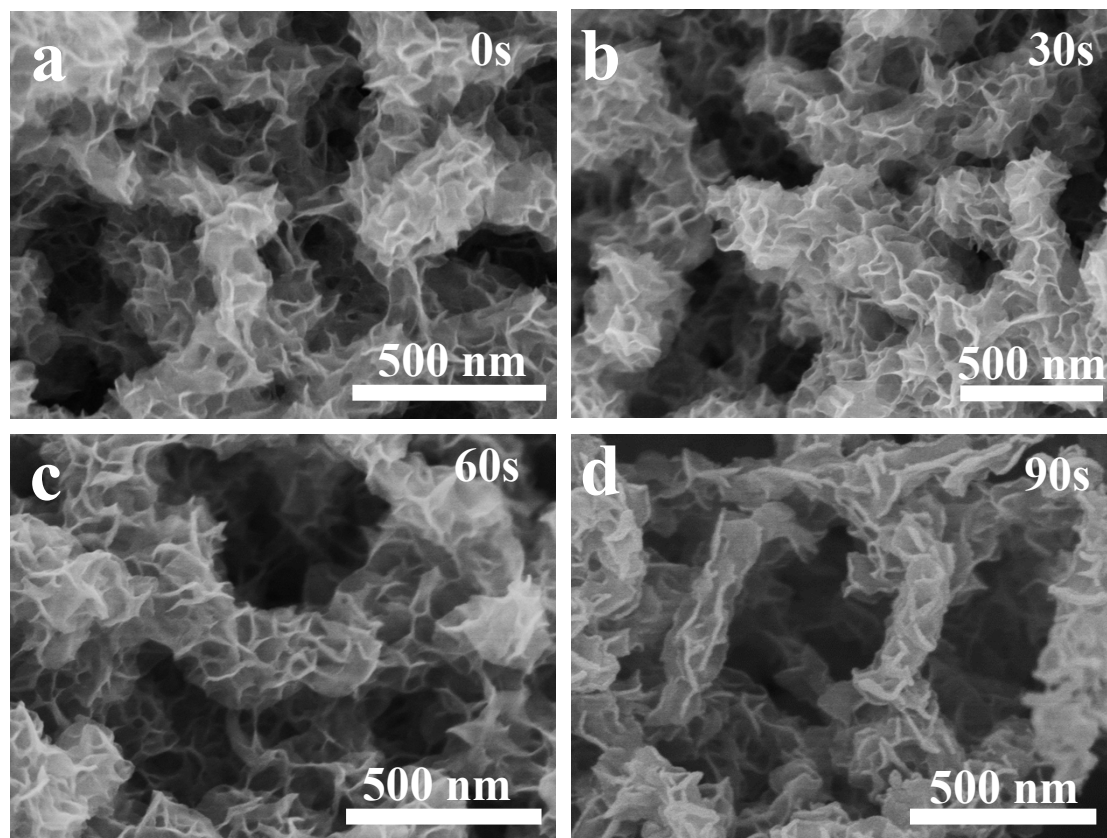

Figure S1. SEM images of a) N-MoS<sub>2</sub>@CNTs-0s; b) N-MoS<sub>2</sub>@CNTs-30s; c) N-MoS<sub>2</sub>@CNTs-60s; d) N-MoS<sub>2</sub>@CNTs-90s.

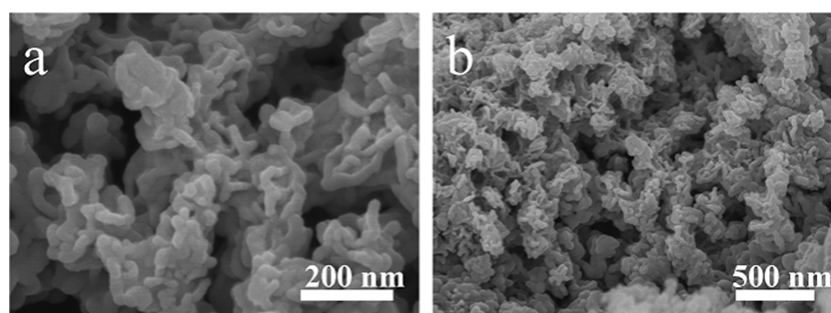

Figure S2. SEM images of S/N-MoS<sub>2</sub>@CNTs-60s.

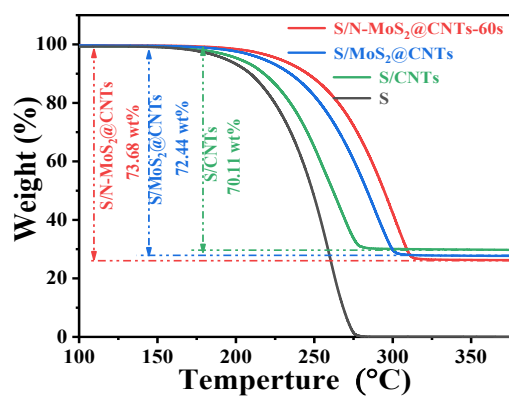

Figure S3. TGA curves of different samples.

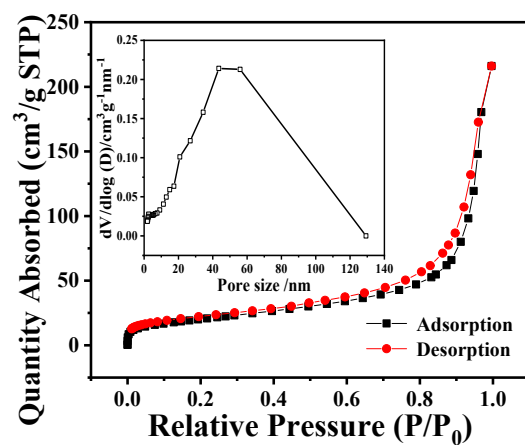

Figure S4. Nitrogen adsorption–desorption isotherm curves of N-MoS<sub>2</sub>@CNTs, the inset shows their pore-size distribution curves.

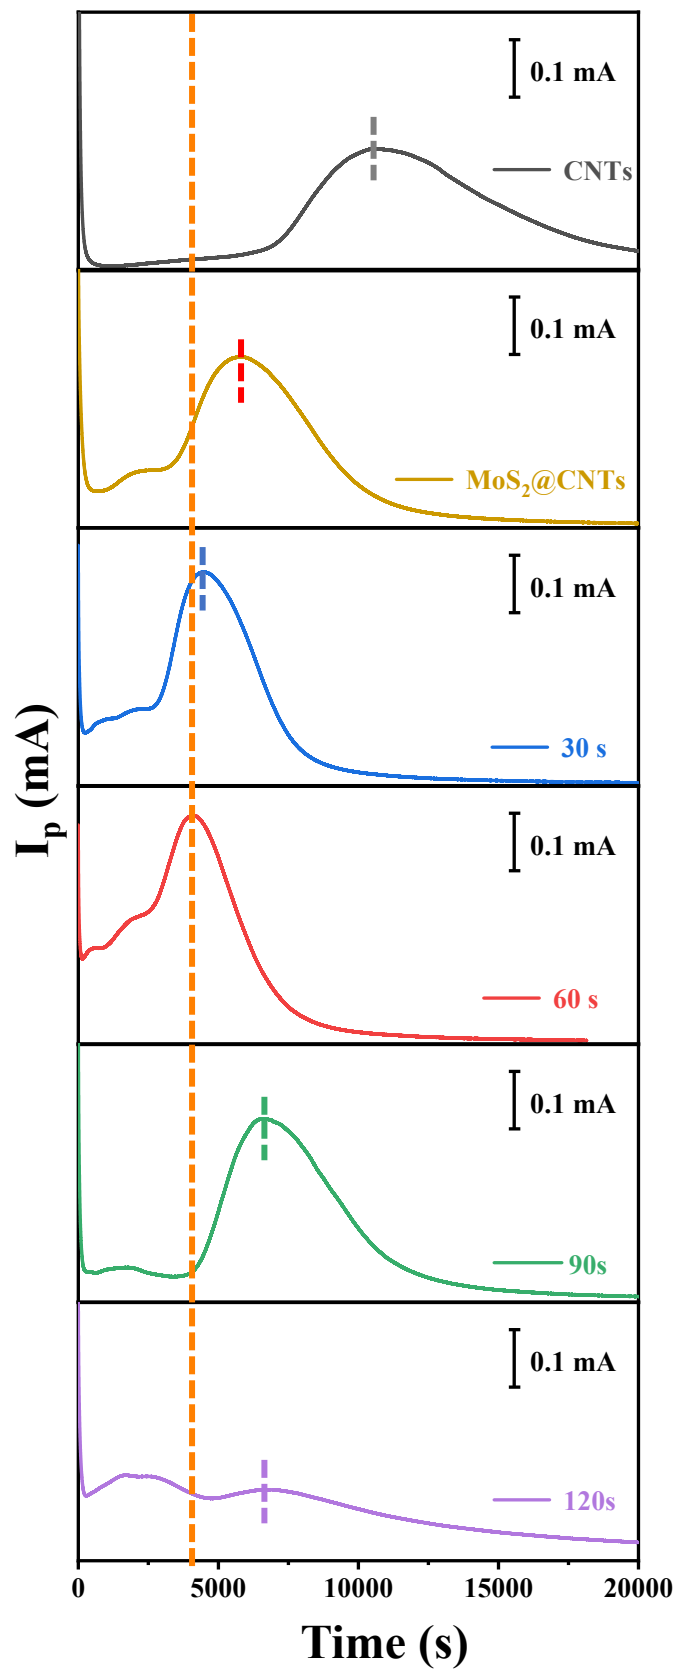

Figure S5. Potentiostatic discharge profiles of a  $\text{Li}_2\text{S}_8$ /tetraglyme solution on various surfaces at 2.05 V.

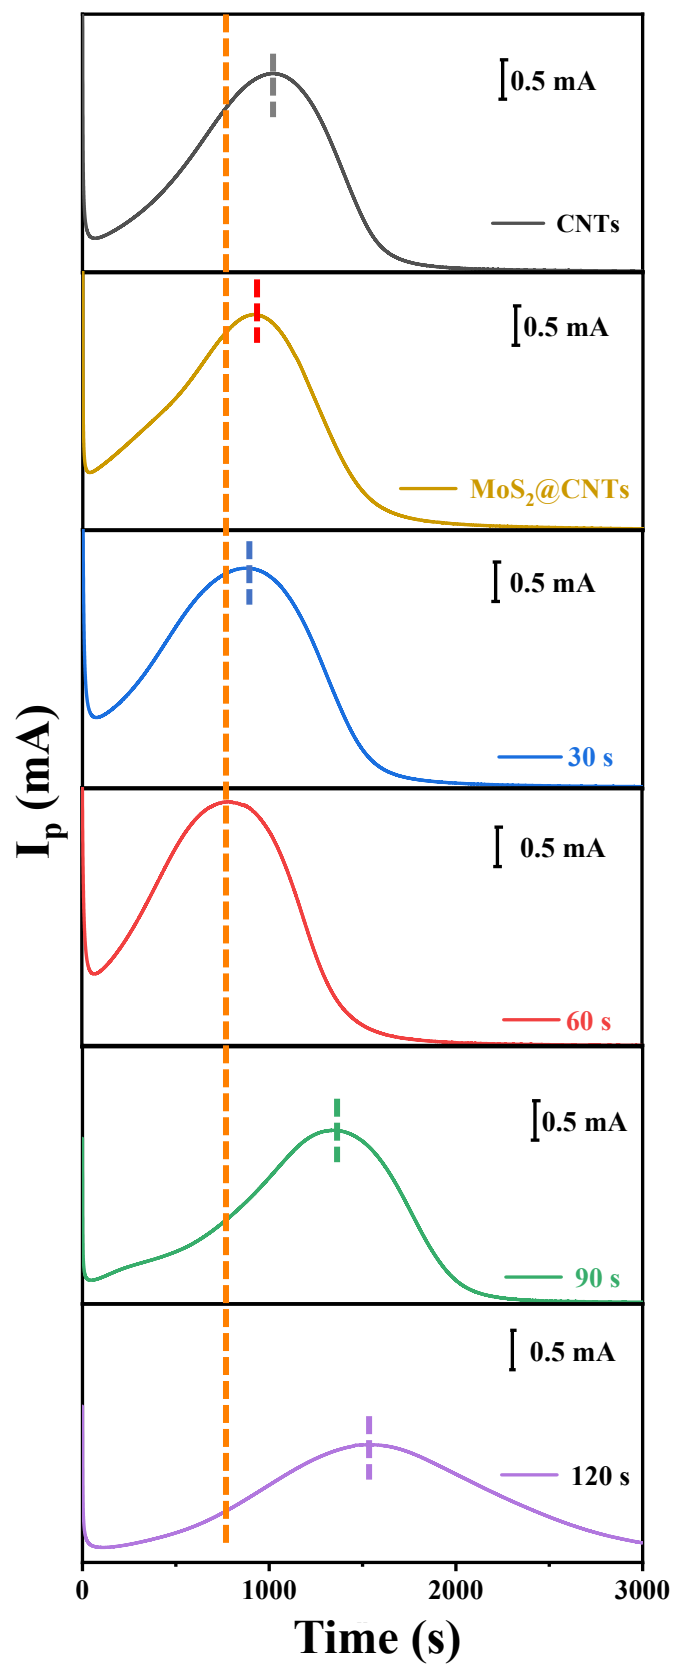

Figure S6. Potentiostatic charge profiles of a  $\text{Li}_2\text{S}_8$ /tetraglyme solution on various surfaces at 2.4 V.

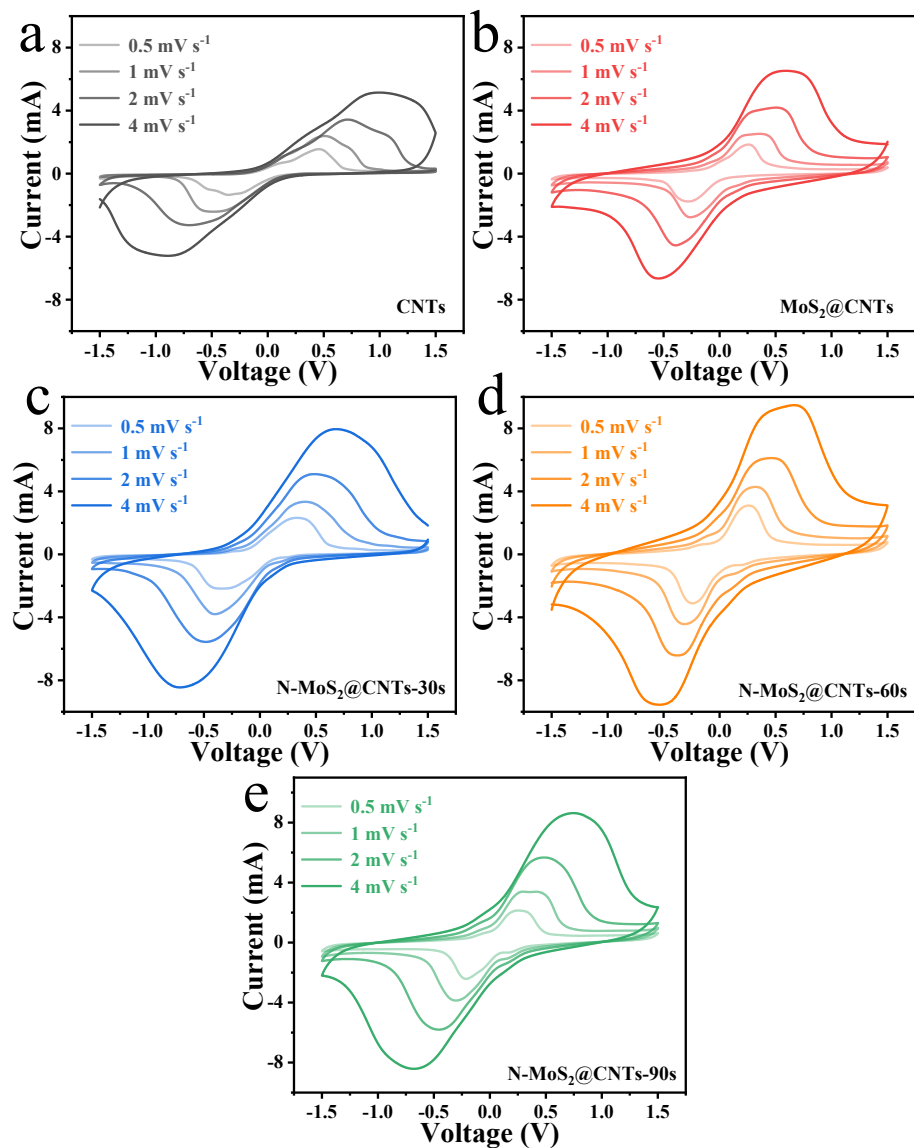

Figure S7. CV curves at different scan rates of different samples.

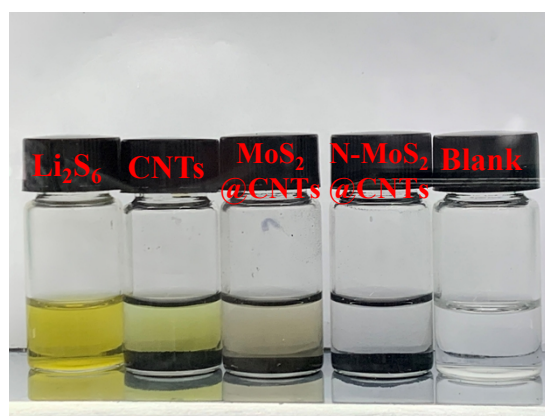

Figure S8. Digital photo of  $\text{Li}_2\text{S}_6$  adsorption test.



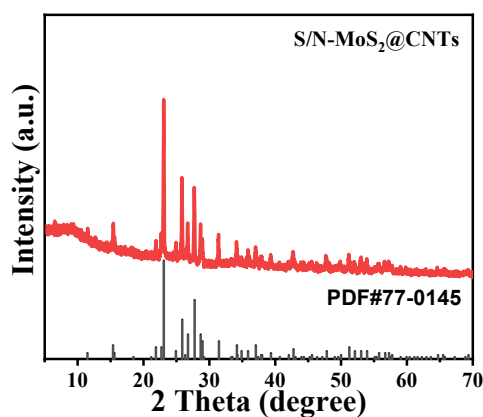

Figure S9. XRD curve of S/N-MoS<sub>2</sub>@CNTs.

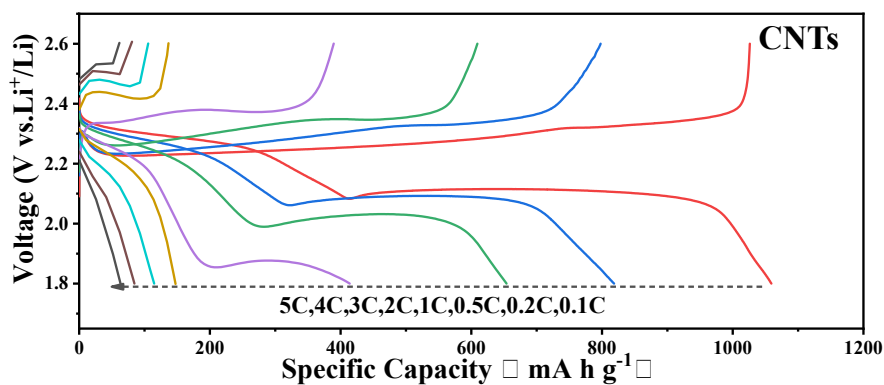

Figure S10. Charge/discharge curves of S/CNTs at various C-rates (0.1 C to 5 C).

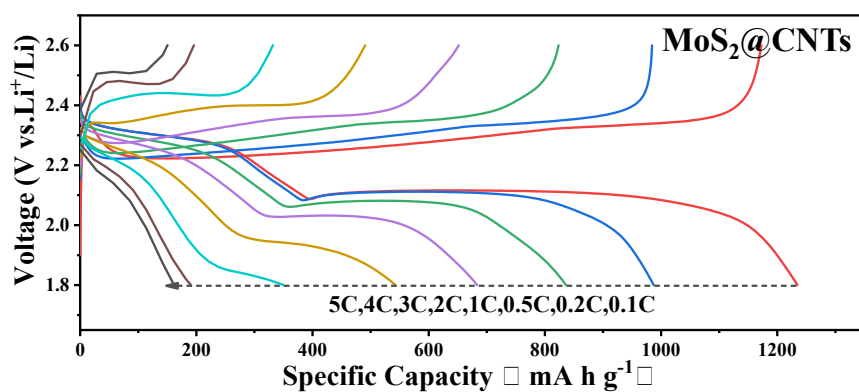

Figure S11. Charge/discharge curves of MoS<sub>2</sub>@CNTs at 0.1 C to 5 C.

Table S1. Performance comparison of N-MoS<sub>2</sub>/CNTs composite with other MoS<sub>2</sub> based materials in literatures.

| Sample                            | S loading (mg cm <sup>-2</sup> ) | S content (wt.%) | Current density | Initial discharge capacity (mAh/g) |                     |        | [ref.]       |
|-----------------------------------|----------------------------------|------------------|-----------------|------------------------------------|---------------------|--------|--------------|
|                                   |                                  |                  |                 | Cycle Number                       | Capacity decay rate |        |              |
| MoS <sub>2</sub> coated separator | —                                | 65               | 0.5C            | 808                                | 600                 | 0.083% | <sup>1</sup> |

|                                                                     |            |              |                       |               |             |               |                  |
|---------------------------------------------------------------------|------------|--------------|-----------------------|---------------|-------------|---------------|------------------|
| Thin layered MoS <sub>2</sub> coated on separator                   | 4          | 70           | 0.5C                  | 983           | 150         | 0.34%         | 2                |
| MoS <sub>2</sub> /g-C <sub>3</sub> N <sub>4</sub> as sulfur host    | 1.5        | 59.1         | 1C                    | 780           | 400         | 0.067%        | 3                |
| rGO/MoS <sub>2</sub> coated separator                               | 1.8-2      | 70           | 0.2C                  | 1121          | 200         | 0.2%          | 4                |
| rGO/MoS <sub>2</sub> as sulfur host                                 | 0.85       | 80           | 1C                    | 873           | 300         | 0.15%         | 5                |
| CC@MoS <sub>2</sub> as sulfur host                                  | 2          | —            | 0.5C                  | 898           | 300         | 0.074%        | 6                |
| P-Mo <sub>0.9</sub> Co <sub>0.1</sub> S <sub>2</sub> as sulfur host | 2          | 80           | 0.5C                  | 1332          | 150         | 0.072%        | 7                |
| MoS <sub>2</sub> /Graphene as interlayer                            | 0.8–1.2    | 60           | 0.5 A g <sup>-1</sup> | 850           | 200         | 0.094%        | 8                |
| MoS <sub>2</sub> @G-PCNFs as sulfur host                            | 1          | —            | 0.1                   | 1385          | 100         | 0.38%         | 9                |
| <b>N-MoS<sub>2</sub>@CNTs as sulfur host</b>                        | <b>1.1</b> | <b>73.68</b> | <b>0.1C</b>           | <b>1313.6</b> | <b>200</b>  | <b>0.13%</b>  | <b>This work</b> |
|                                                                     | <b>1.1</b> |              | <b>1C</b>             | <b>804</b>    | <b>1000</b> | <b>0.047%</b> |                  |
|                                                                     | <b>5.1</b> |              | <b>0.1C</b>           | <b>970.4</b>  | <b>100</b>  | <b>1.01%</b>  |                  |

## References

1. Z. A. Ghazi, X. He, A. M. Khattak, N. A. Khan, B. Liang, A. Iqbal, J. X. Wang, H. S. Sin, L. S. Li and Z. Y. Tang, *Adv. Mater.*, 2017, **29**, 1606817.
2. P. J. Han, S. H. Chung and A. Manthiram, *ACS Appl. Mater.*, 2018, **10**, 23122-23130.
3. S. Majumder, M. H. Shao, Y. F. Deng and G. H. Chen, *JPS*, 2019, **431**, 93-104.
4. L. Tan, X. H. Li, Z. X. Wang, H. J. Guo and J. X. Wang, *ACS Appl. Mater.*, 2018, **10**, 3707-3713.
5. Y. You, Y. W. i. Ye, M. L. Wei, W. J. Sun, Q. Tang, J. Zhang, X. Chen, H. Q. Li and J. Xu, *Chem. Eng. J.*, 2019, **355**, 671-678.
6. C. Tian, J. Wu, Z. Ma, B. Li, X. Zhang, X. Zu, X. Xiang and S. Li, *Energy Reports*, 2020, **6**, 172-180.
7. H. Lin, S. Zhang, T. Zhang, H. Ye, Q. Yao, G. W. Zheng and J. Y. Lee, *Adv. Energy Mater.*, 2019, **9**, 1902096.
8. P. Guo, D. Liu, Z. Liu, X. Shang, Q. Liu and D. He, *Electrochim. Acta*, 2017, **256**, 28-36.
9. C. Chai, H. Tan, X. Fan and K. Huang, *JAllC*, 2020, **820**.
